# Supplementary material for: Copper( ii ) complexes of dipica and its derivatives as biomimetic models for phenoxazinone synthase: probing the effect of central N -cycloalkyl rings on reactivity
Source: Royal Society of Chemistry journal article supplement (doi:10.1039/d5nj04085j), 2025-12-11
Supplement: d5nj04085j1.pdf [file d5nj04085j1.pdf]

## Supplementary information

Manuscript ID: **NJ-ART-10-2025-004085**

Article type: **Revised Manuscript**

Submitted to: **New Journal of Chemistry**

### **Copper(II) Complexes of Dipica and Its Derivatives as Biomimetic Models for Phenoxazinone Synthase: Probing the Effect of Central *N*-cycloalkyl Rings on Reactivity**

**Ganesh Yamuna,<sup>1</sup> Devaraj Karthickram,<sup>1</sup> Narasimman Palani,<sup>1</sup> Nattamai Bhuvanesh<sup>2</sup> and Karuppasamy Sundaravel<sup>1\*</sup>**

<sup>1</sup>Bioinorganic Research Laboratory, Department of Chemistry, Bharathiar University, Coimbatore – 641 046, Tamil Nadu, India.

<sup>2</sup>X-ray Diffraction Laboratory, Texas A&M University, College Station, TX 77842, United States. Email: [nbhuv@chem.tamu.edu](mailto:nbhuv@chem.tamu.edu)

---

\*Author to whom correspondence should be addressed: Email: [sundaravel.k@buc.edu.in](mailto:sundaravel.k@buc.edu.in)  
[sundaravel.k@gmail.com](mailto:sundaravel.k@gmail.com)  
Tel: +91-422-2428318

## Table of Contents

|                                 |                                                                                                                                                                        |           |
|---------------------------------|------------------------------------------------------------------------------------------------------------------------------------------------------------------------|-----------|
| <b>1. Supplementary figures</b> |                                                                                                                                                                        |           |
| Figure S1–S4                    | <sup>1</sup> H and <sup>13</sup> C NMR spectra of ligands <b>L1–L4</b> in CDCl <sub>3</sub>                                                                            | S1–S5     |
| Figure S5 & S6                  | ESI-MS profile of ligands <b>L1–L4</b>                                                                                                                                 | S6 & S7   |
| Figure S7                       | ATR-IR of ligands <b>L1–L4</b> and complexes <b>1–4</b>                                                                                                                | S8        |
| Figure S8 & S9                  | TG-DSC curves of complexes <b>1–4</b>                                                                                                                                  | S9 & S10  |
| Figure S10 & S11                | ESI-MS profile of complexes <b>1–4</b>                                                                                                                                 | S11 & S12 |
| Figure S12                      | UV-vis spectral data of complexes <b>1–4</b>                                                                                                                           | S13       |
| Figure S13                      | Cyclic voltammogram of copper(II) complexes <b>1</b> , <b>3</b> and <b>4</b> and their <i>o</i> -aminophenol adducts                                                   | S14       |
| Figure S14 & S15                | UV-vis spectral changes observed for the oxidation of <i>o</i> -aminophenol catalysed by <b>1</b> , <b>3</b> and <b>4</b> in water                                     | S15 & S16 |
| Figure S16–S19                  | ESI-MS profile of 1:50 mixture of <b>1–4</b> and H <sub>2</sub> AP in methanol-water mixture.                                                                          | S17–S21   |
| Figure S20                      | Detection of H <sub>2</sub> O <sub>2</sub> by the formation of I <sub>3</sub> <sup>–</sup> the course of catalytic reaction of <b>1–4</b> with H <sub>2</sub> AP       | S22       |
| Figure S21                      | <sup>1</sup> H NMR spectrum and ESI-MS profile of phenoxazinone chromophore                                                                                            | S23       |
| Figure S22                      | UV-vis spectral changes observed for the oxidation of <i>o</i> -aminophenol catalysed by <b>2</b> in presence of O <sub>2</sub> and N <sub>2</sub> atmosphere in water | S24       |
| <b>2. Supplementary tables</b>  |                                                                                                                                                                        |           |
| Table S1                        | ATR-IR spectral data of ligands <b>L1–L4</b> and complexes <b>1–4</b> .                                                                                                | S25       |
| Table S2                        | TG-DSC data of complexes <b>1–4</b> .                                                                                                                                  | S26       |

Figure S1

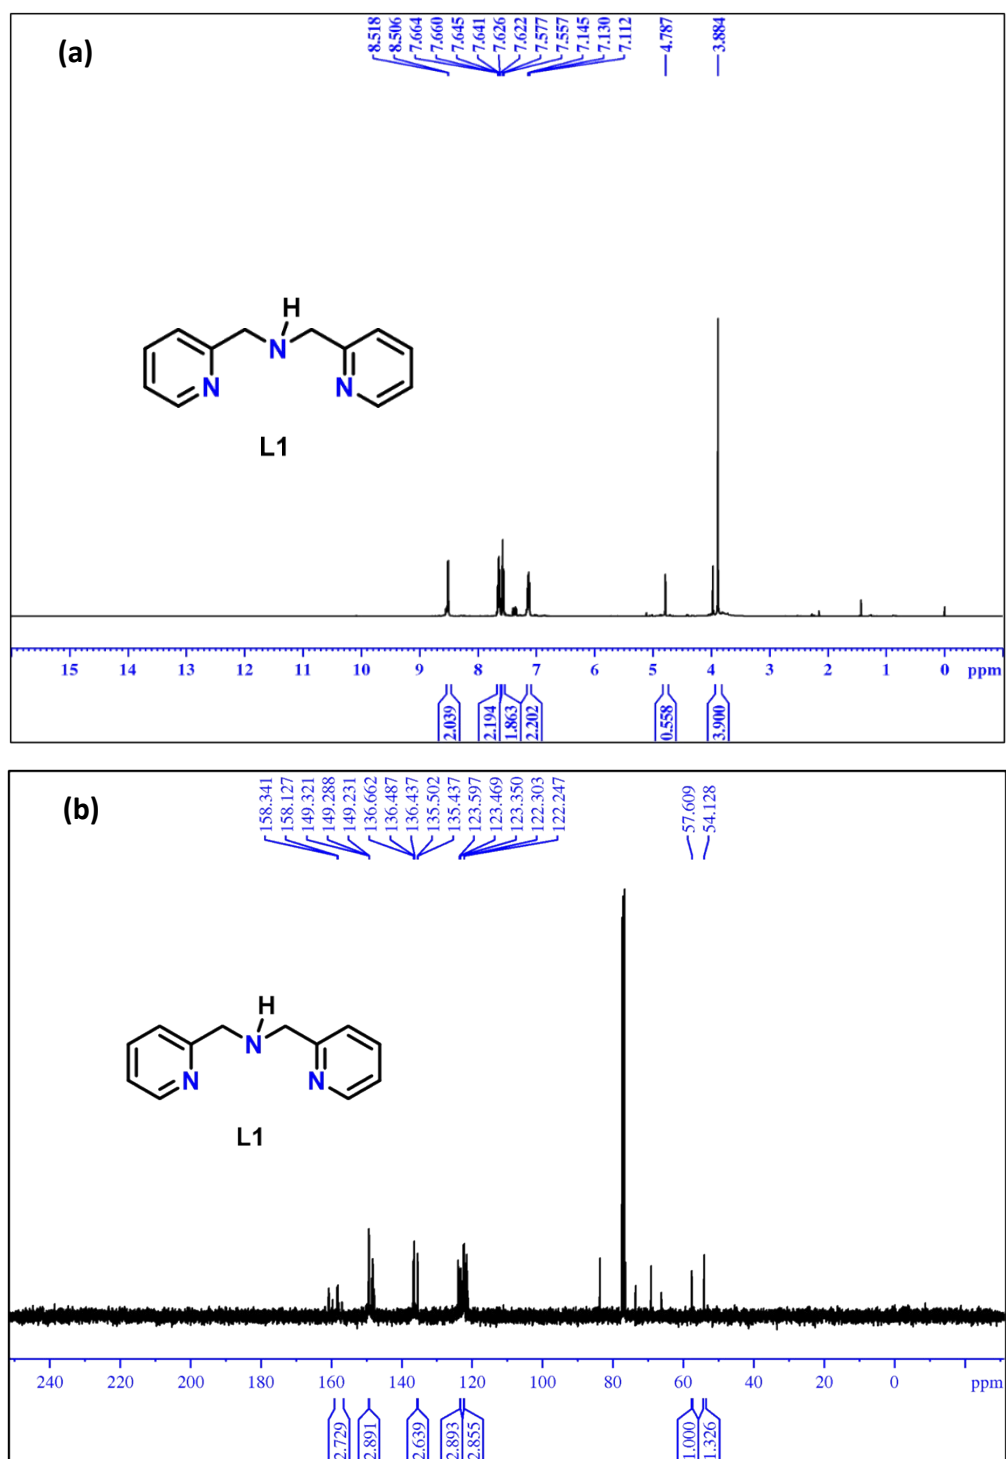

Figure S1. (a) <sup>1</sup>H and (b) <sup>13</sup>C{<sup>1</sup>H} NMR spectra of **L1** in CDCl<sub>3</sub> at 298 K.

Figure S2

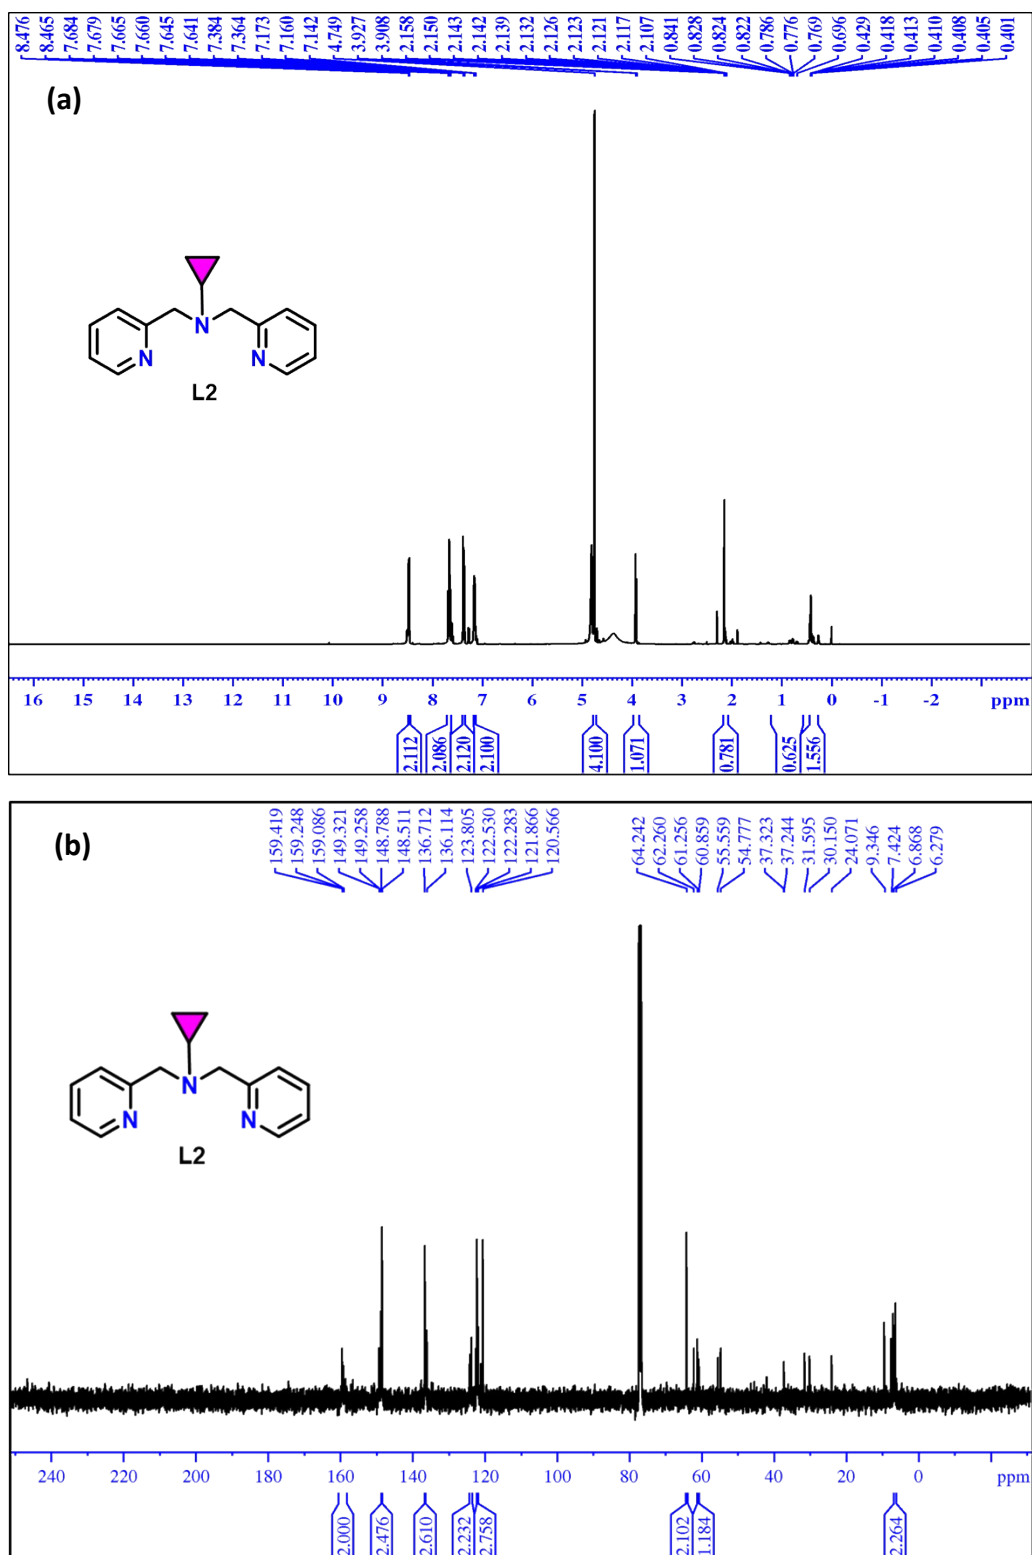

Figure S2. (a)  $^1\text{H}$  and (b)  $^{13}\text{C}\{^1\text{H}\}$  NMR spectra of **L2** in  $\text{CDCl}_3$  at 298 K.

Figure S3

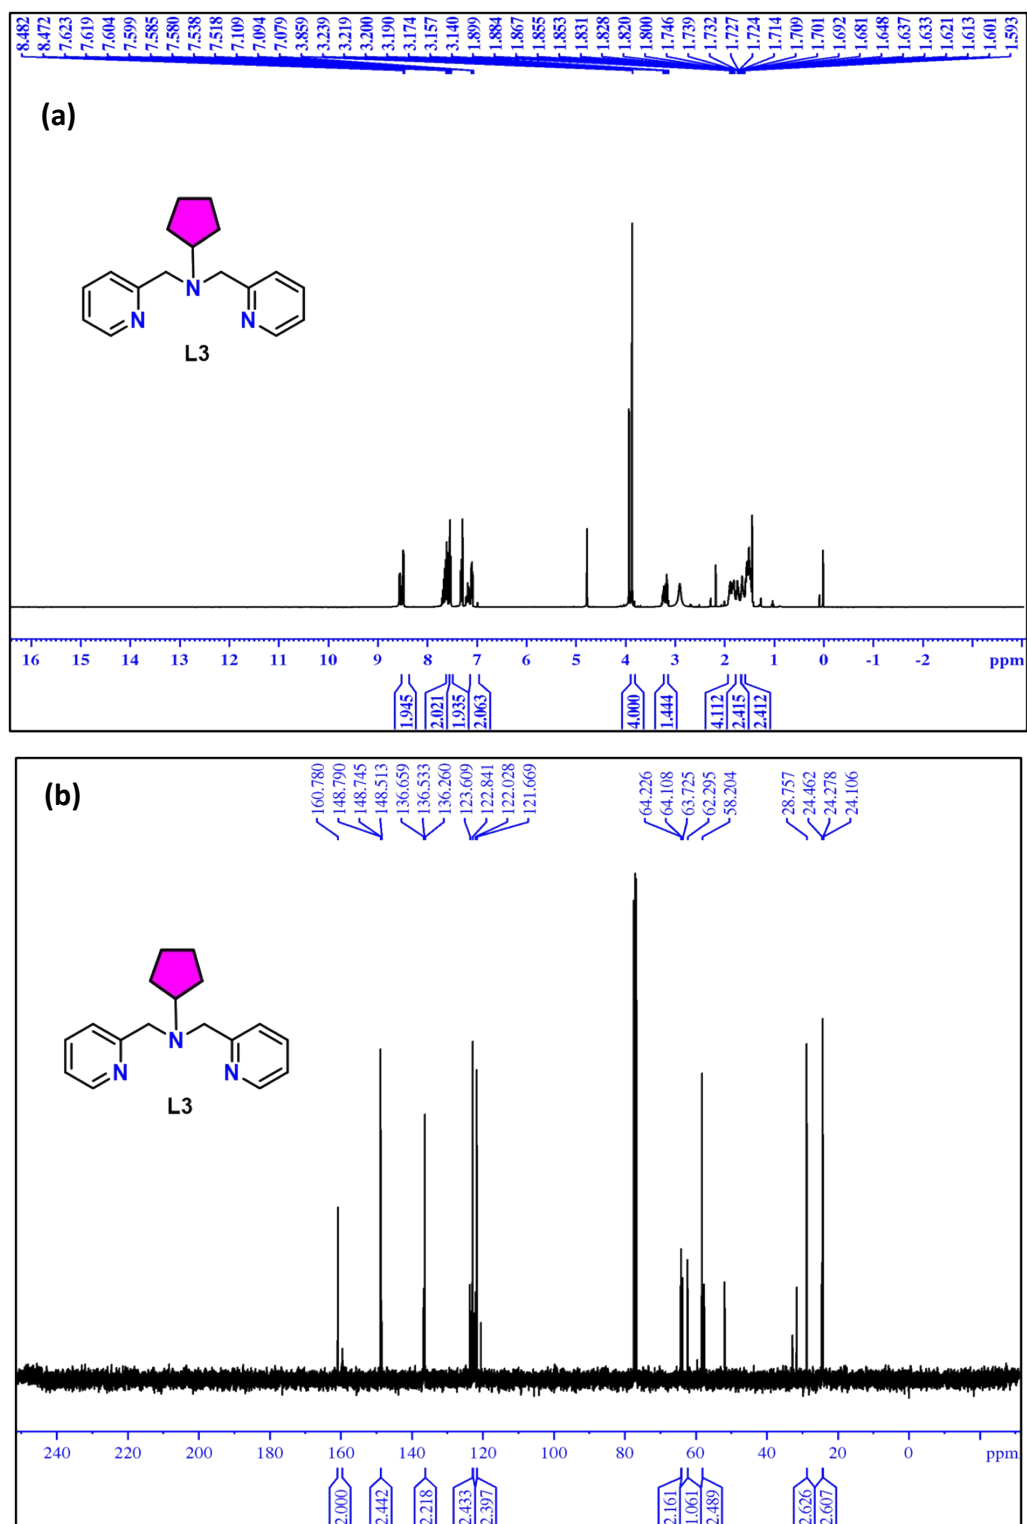

Figure S3. (a) <sup>1</sup>H and (b) <sup>13</sup>C{<sup>1</sup>H} NMR spectra of **L3** in CDCl<sub>3</sub> at 298 K.

Figure S4

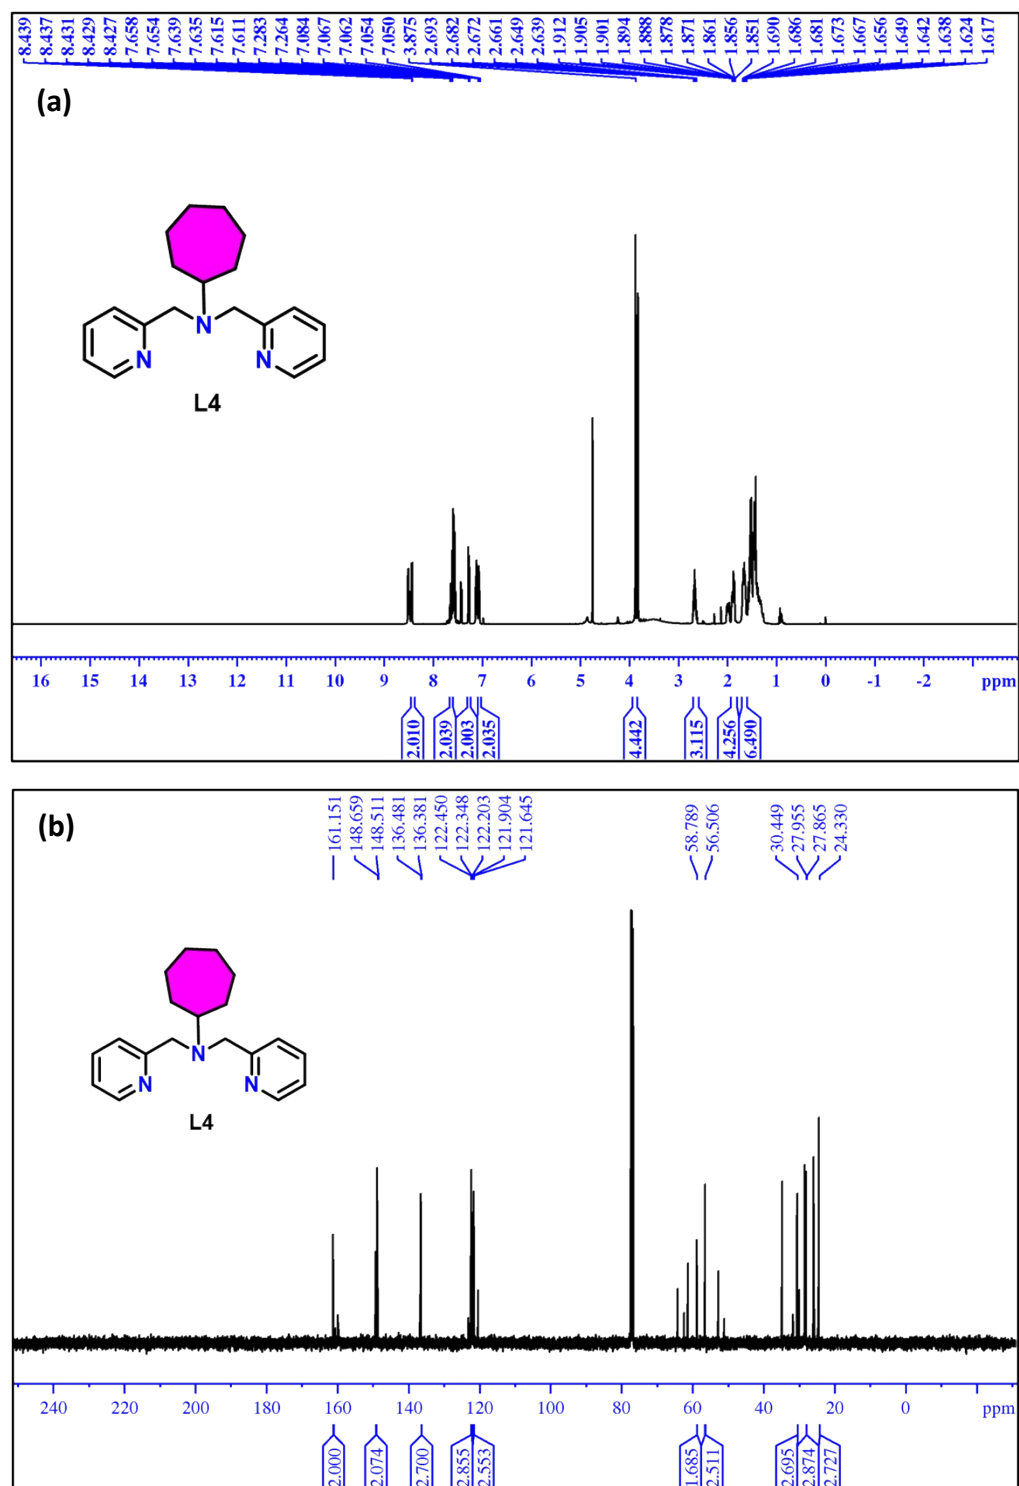

Figure S4. (a)  $^1\text{H}$  and (b)  $^{13}\text{C}\{^1\text{H}\}$  NMR spectra of **L4** in CDCl<sub>3</sub> at 298 K.

Figure S5

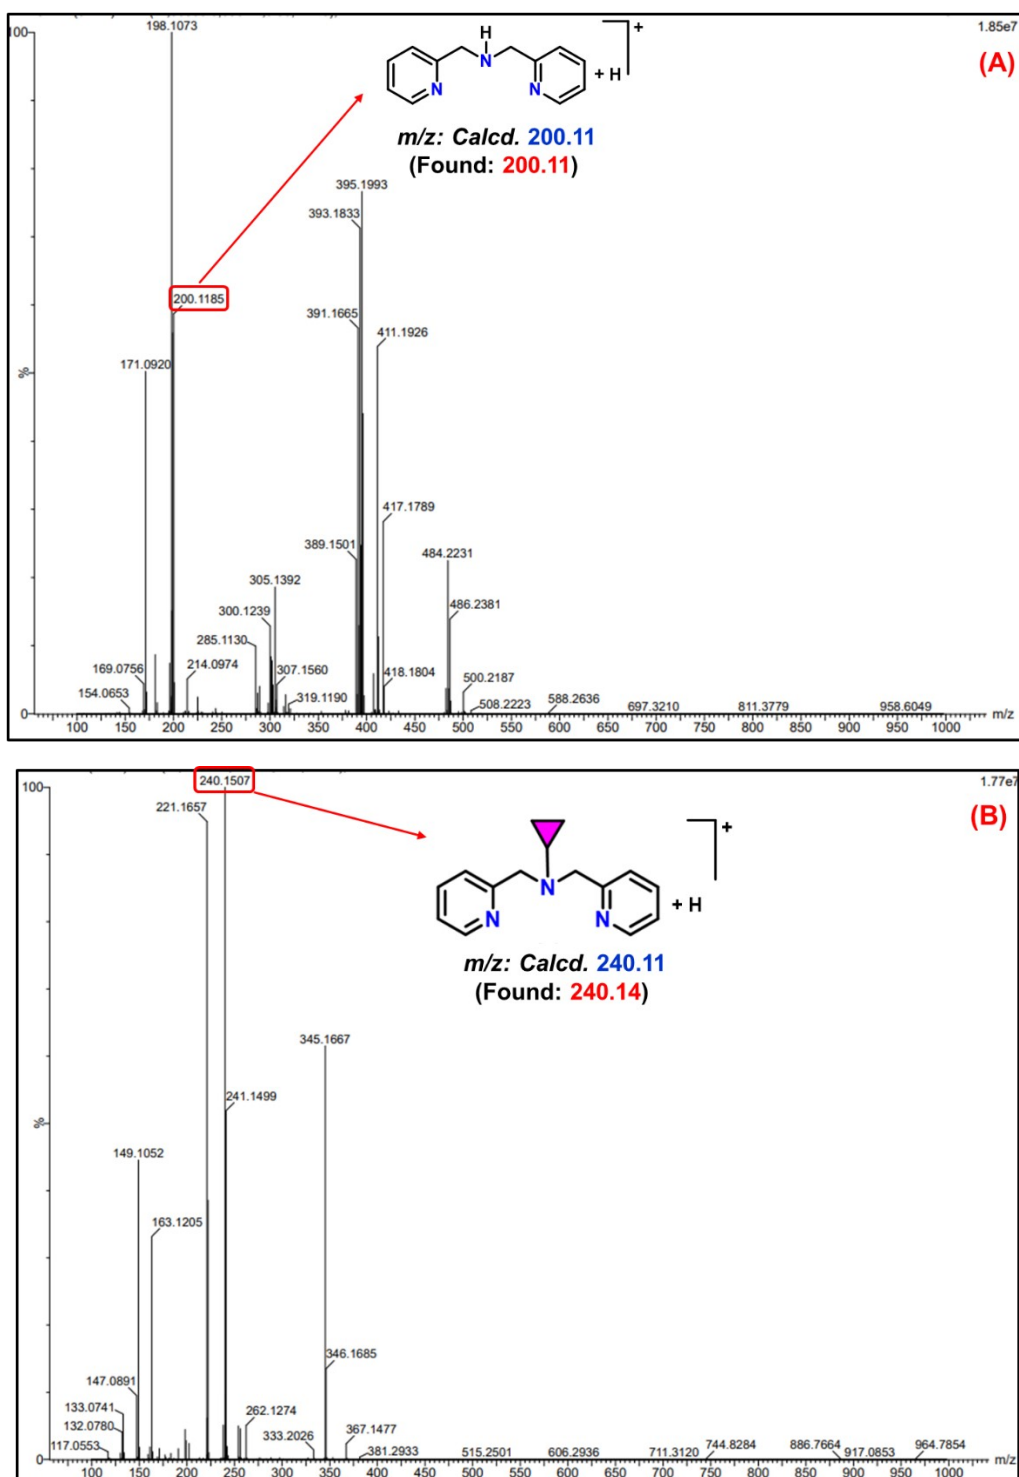

Figure S5. ESI-MS profile of ligands **L1** (A) and **L2** (B) in CH<sub>3</sub>OH.

Figure S6

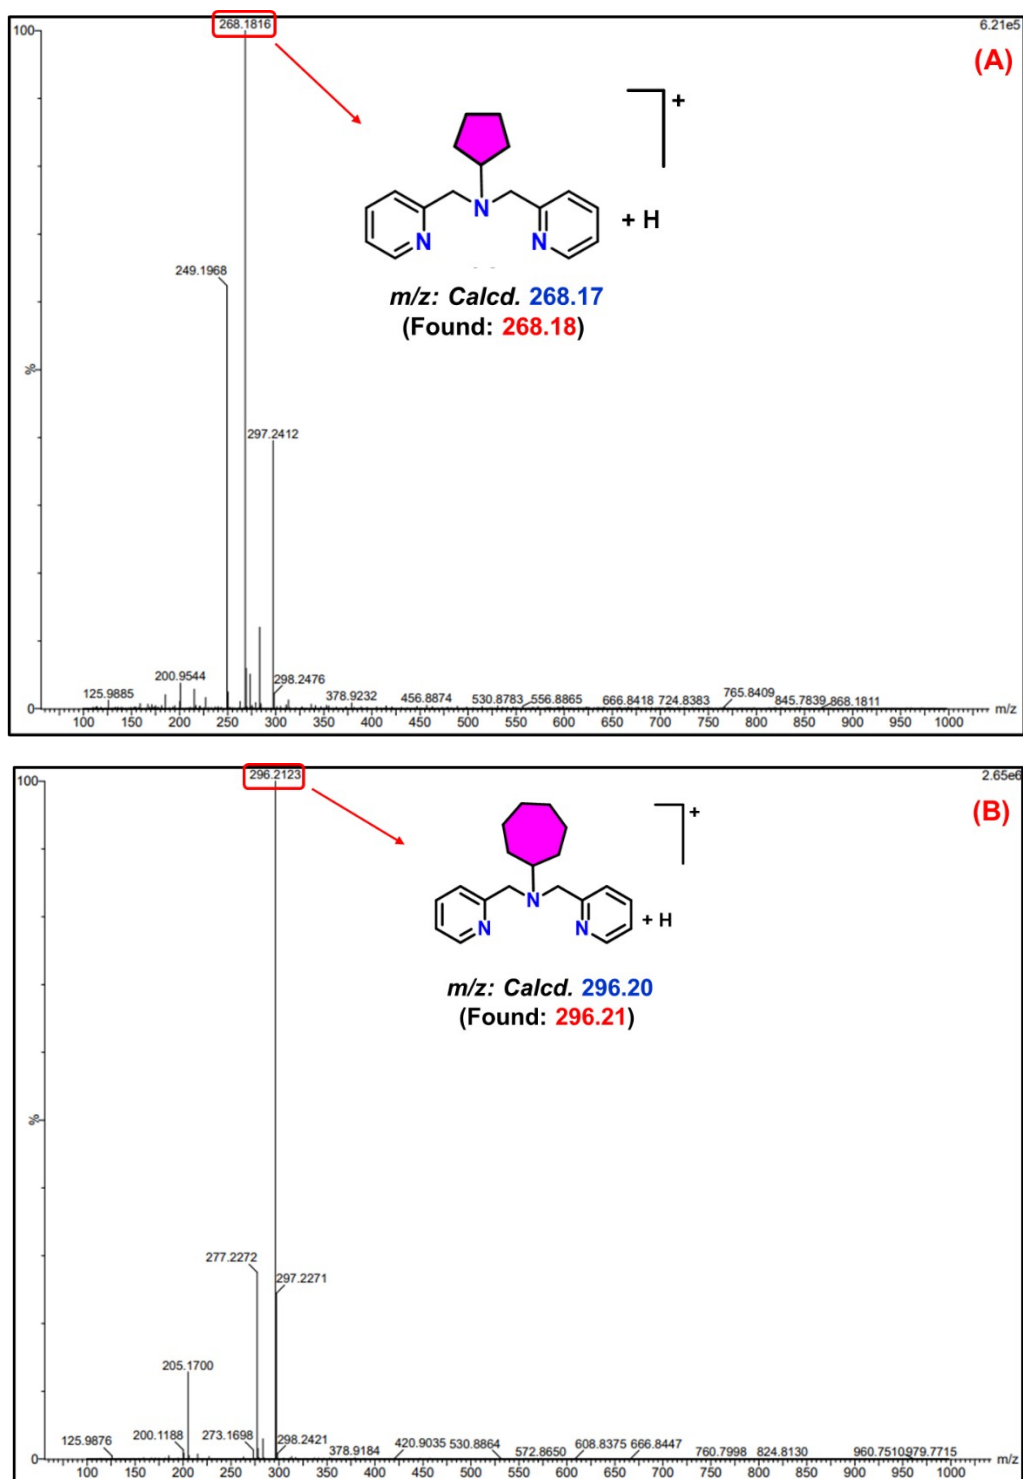



Figure S7

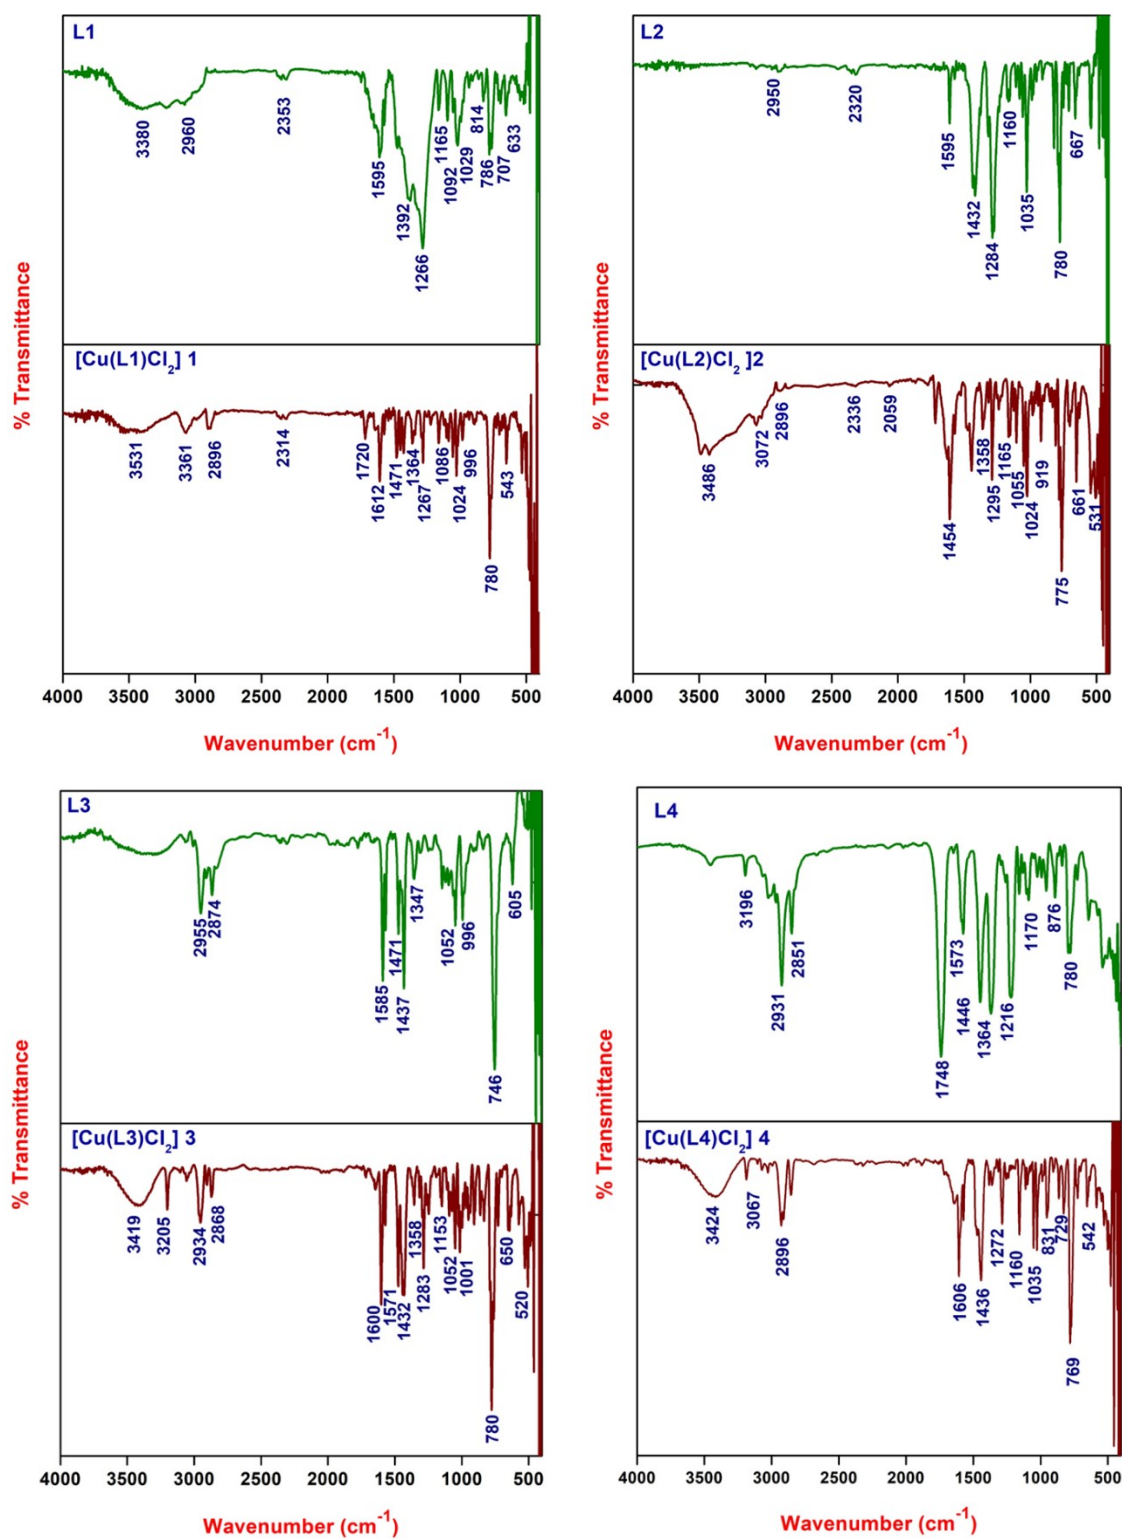

Figure S7. ATR-IR spectral data of ligands L1-L4 and their corresponding complexes 1-4.

Figure S8

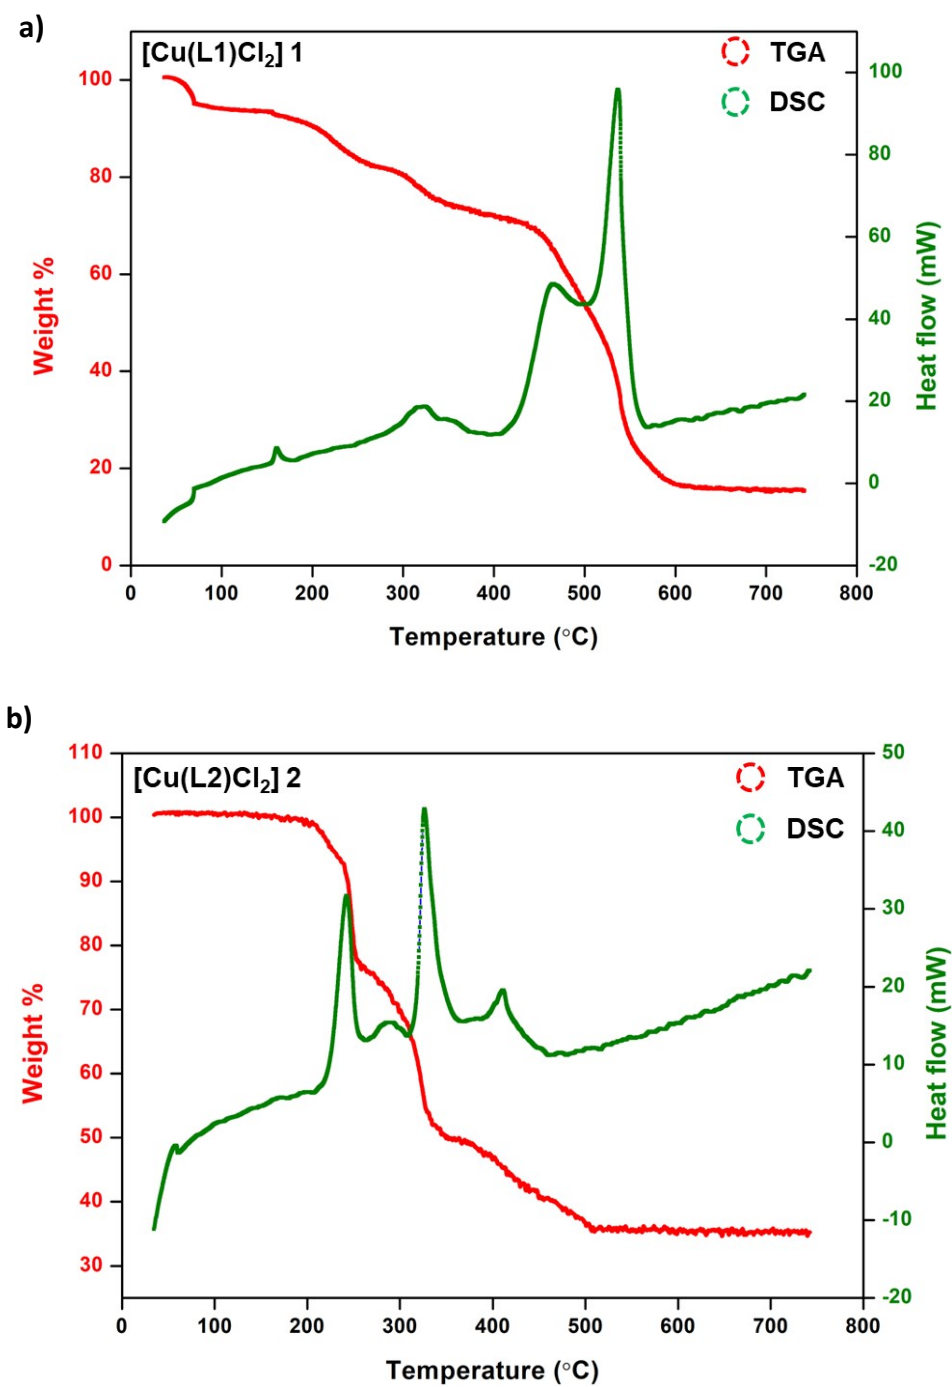

**Figure S8.** TG-DSC curves of copper(II) complexes **1** (a) and **2** (b).

Figure S9

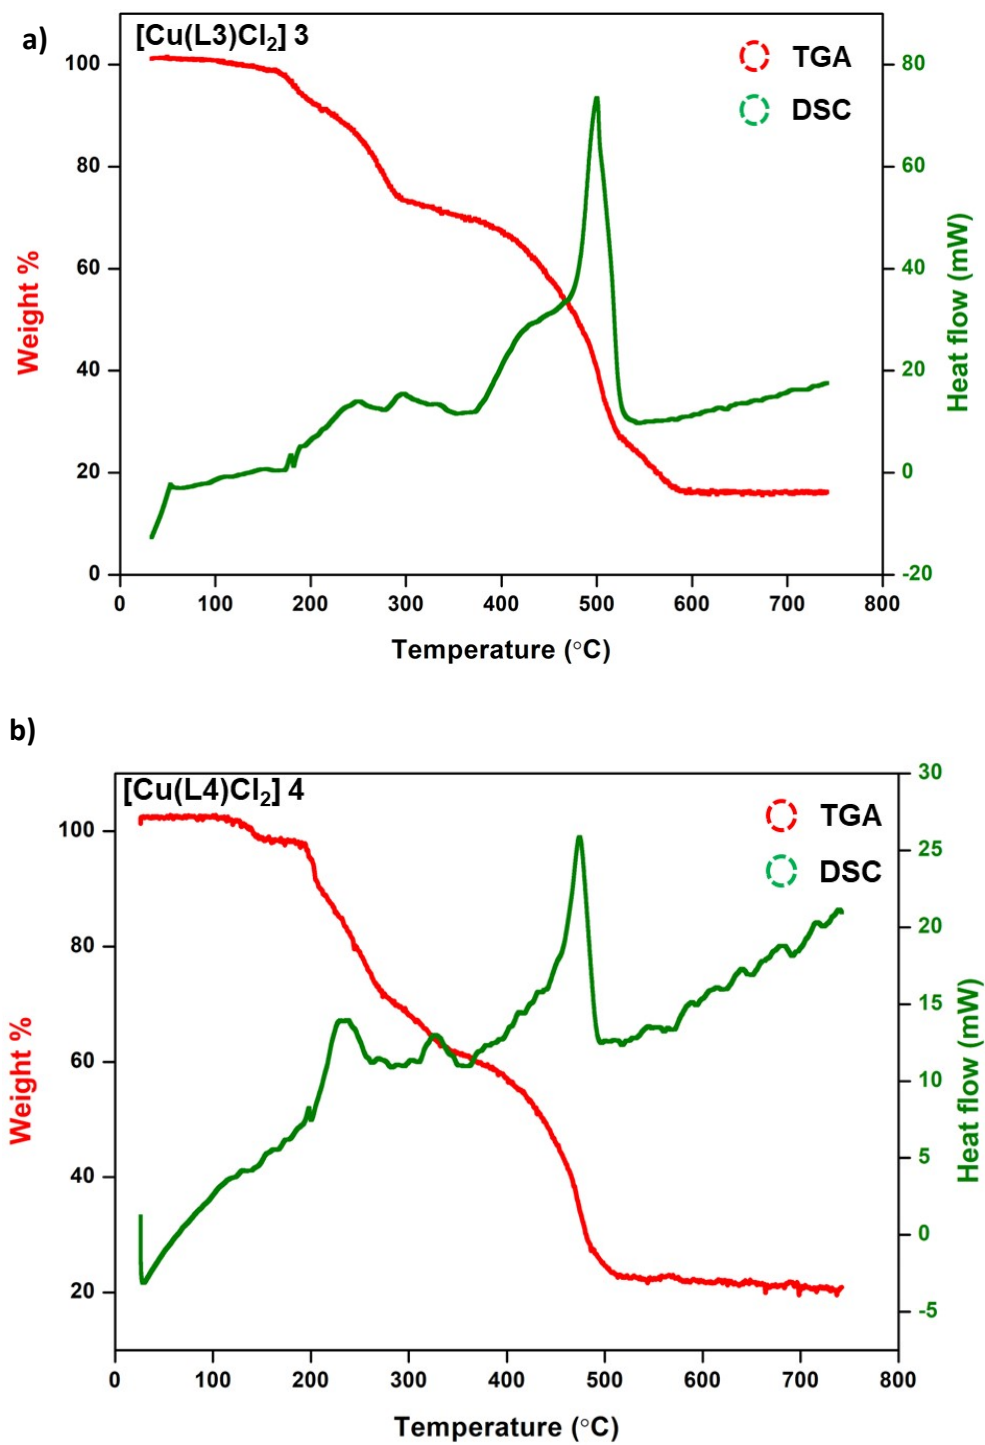

Figure S9. TG-DSC curves of copper(II) complexes **3** (a) and **4** (b).

Figure S10

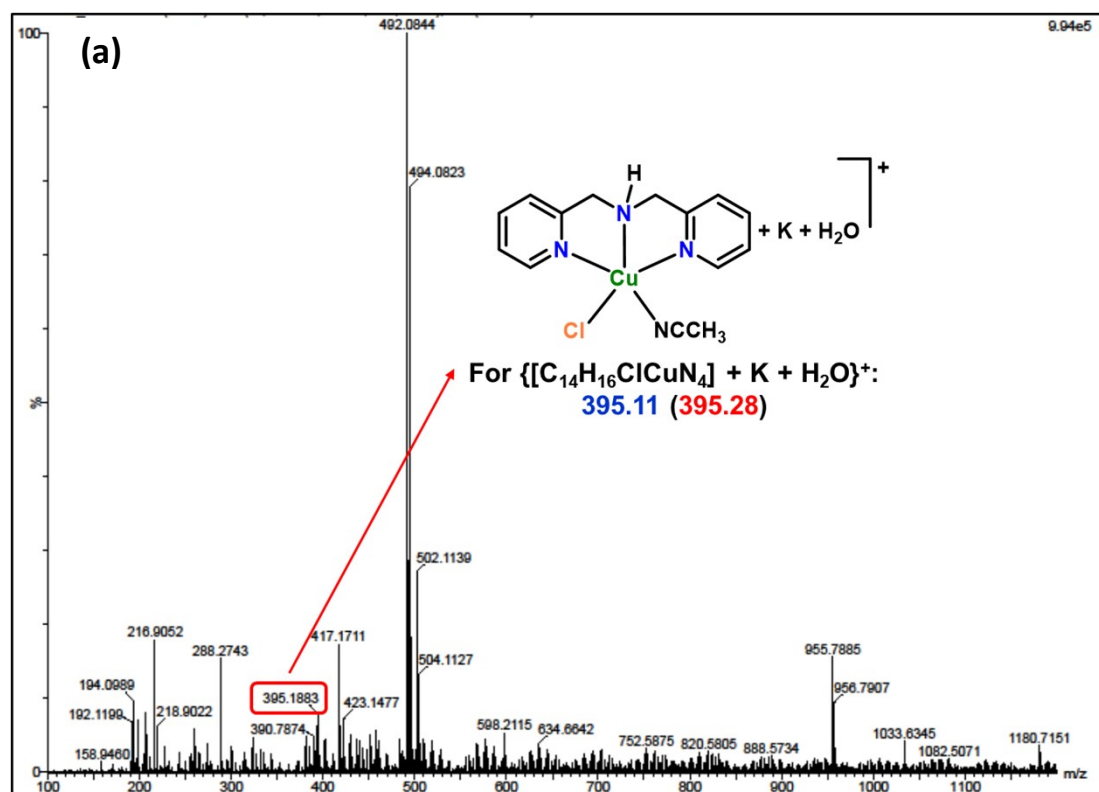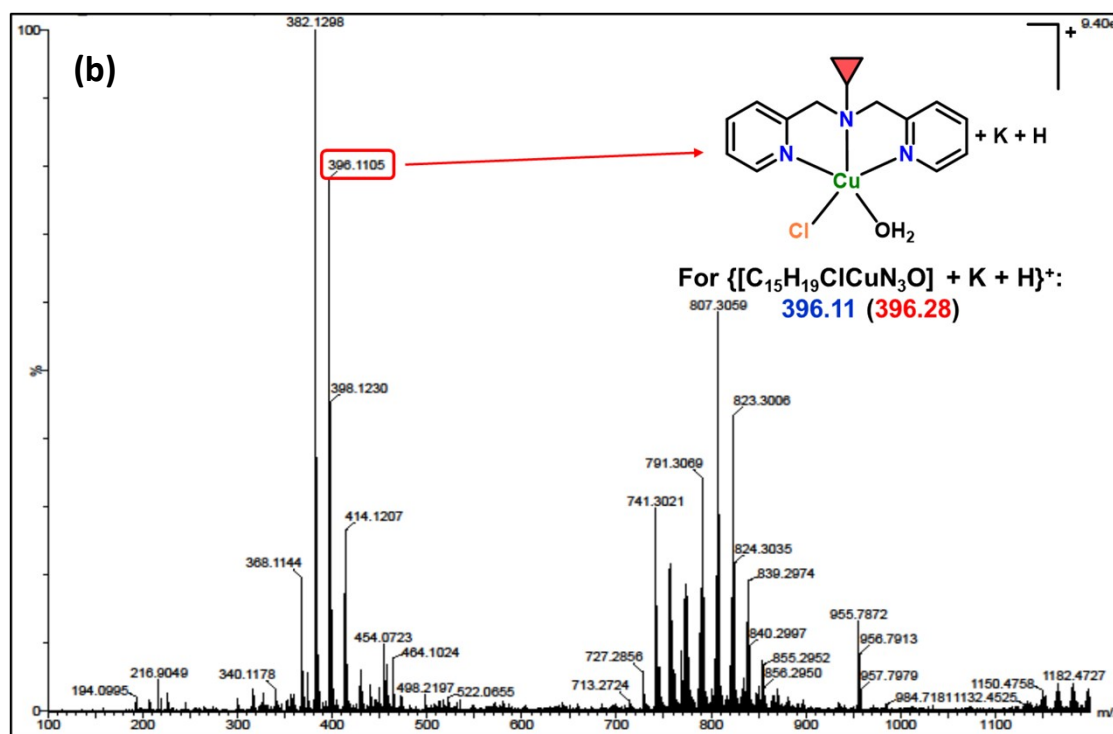

Figure S10. ESI-MS profile of copper(II) complex 1 (a) and 2 (b) in CH<sub>3</sub>OH:CH<sub>3</sub>CN (1:1 v/v).

Figure S11

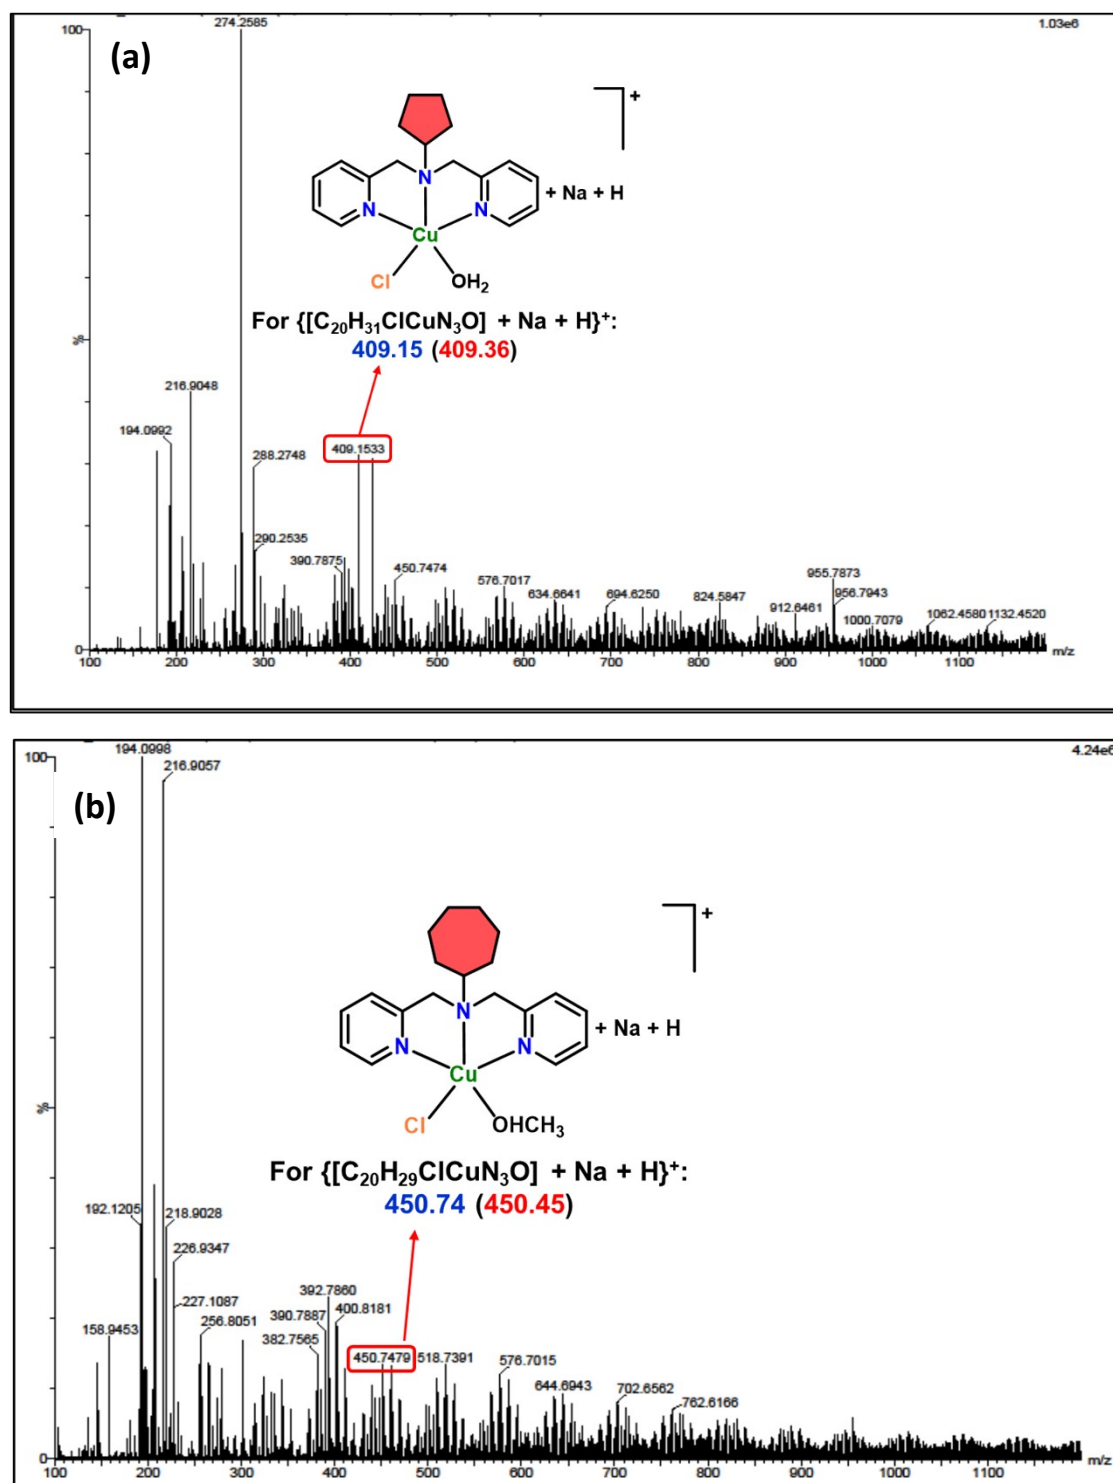

Figure S11. ESI-MS profile of copper(II) complex **3** (a) and **4** (b) in  $\text{CH}_3\text{OH}:\text{CH}_3\text{CN}$  (1:1 v/v).

Figure S12

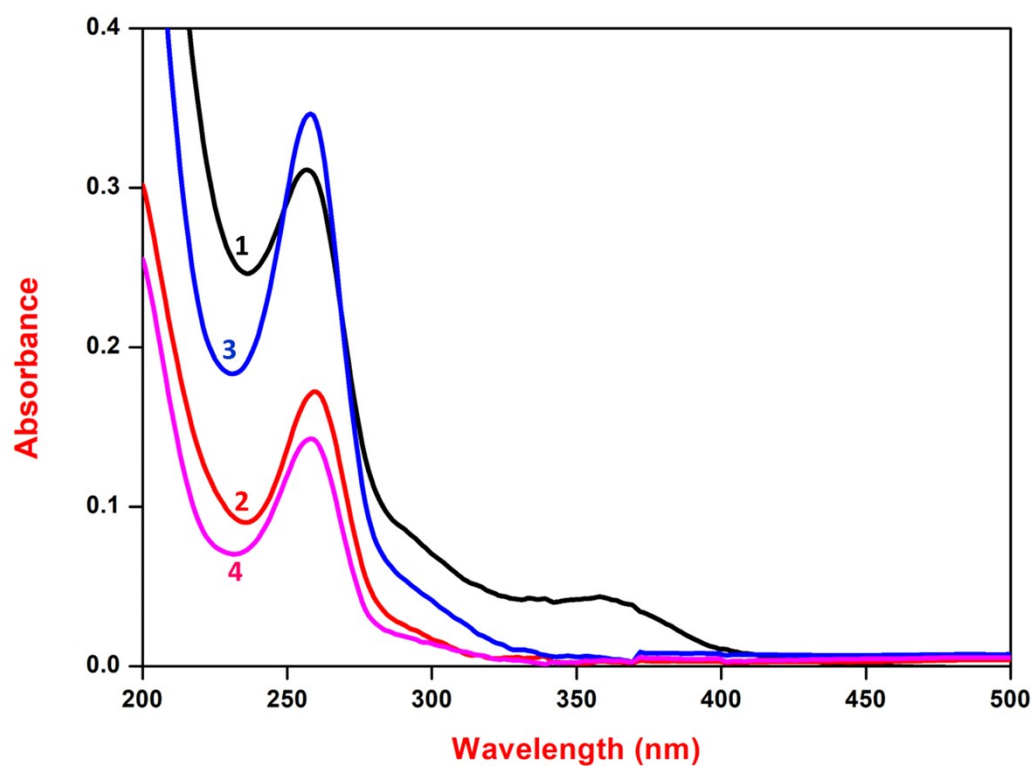

**Figure S12.** UV-vis absorption spectral data of copper(II) complexes **1** (black) **2** (red), **3** (blue) and **4** (pink) ( $1 \times 10^{-3}$  M) in  $\text{H}_2\text{O}$  at 25 °C.

Figure S13

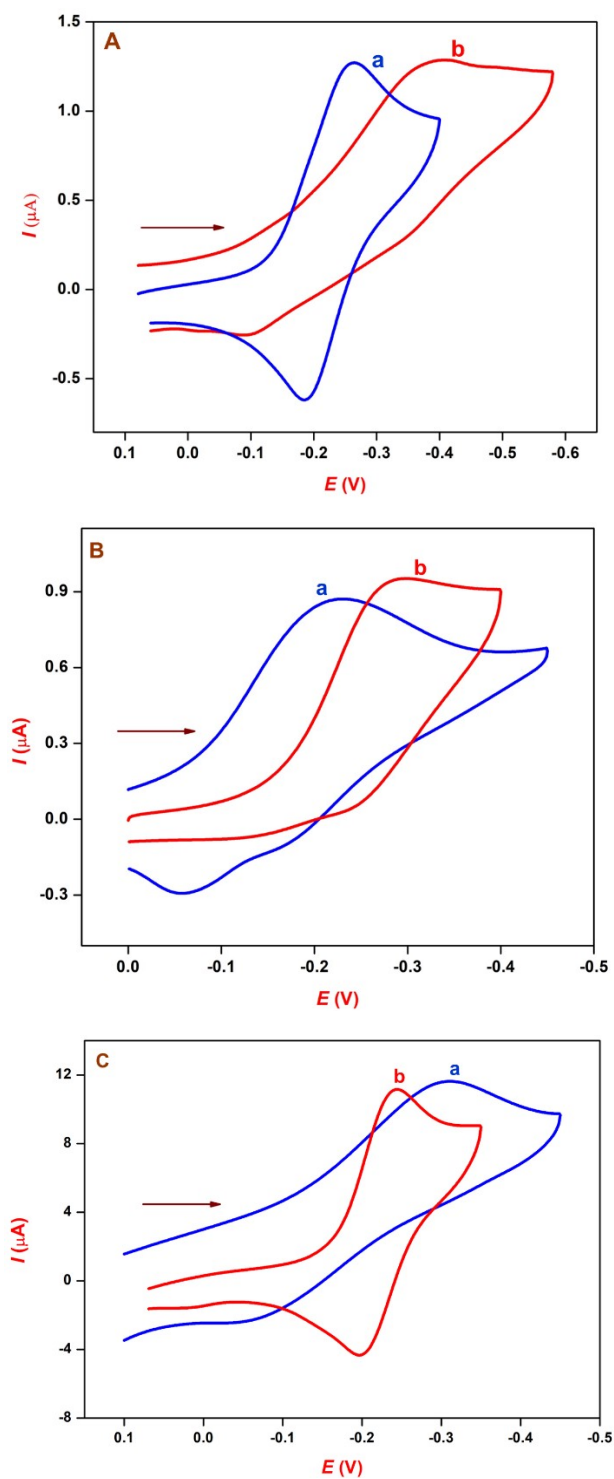

**Figure S13.** Cyclic voltammogram of **1** (A), **3** (B) and **4** (C) ( $1 \times 10^{-3}$  M) in water at 25 °C measured vs saturated Ag/AgCl. Scan rate  $50 \text{ mV s}^{-1}$  and supporting electrolyte KCl (0.1 M).

Figure S14

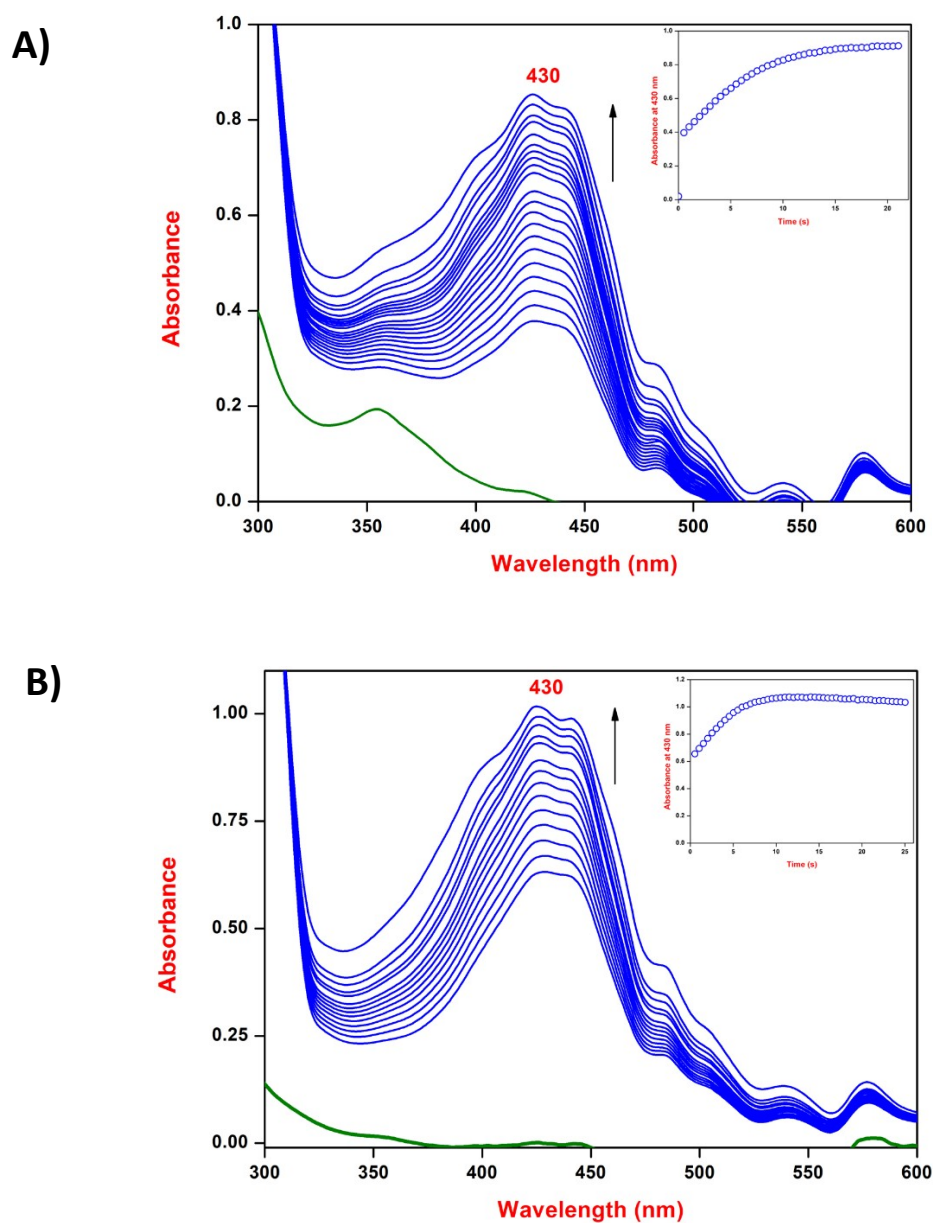

**Figure S14.** (A). UV-vis spectral changes showing the formation of phenoxazinone chromophore at 430 nm upon the addition of *o*-aminophenol ( $1.33 \times 10^{-4}$  M) to a solution of **1** (A) and **3** (B) ( $3.33 \times 10^{-6}$  M) in H<sub>2</sub>O at room temperature in the presence of O<sub>2</sub>. Inset shows the time trace of the reaction.



Figure S15

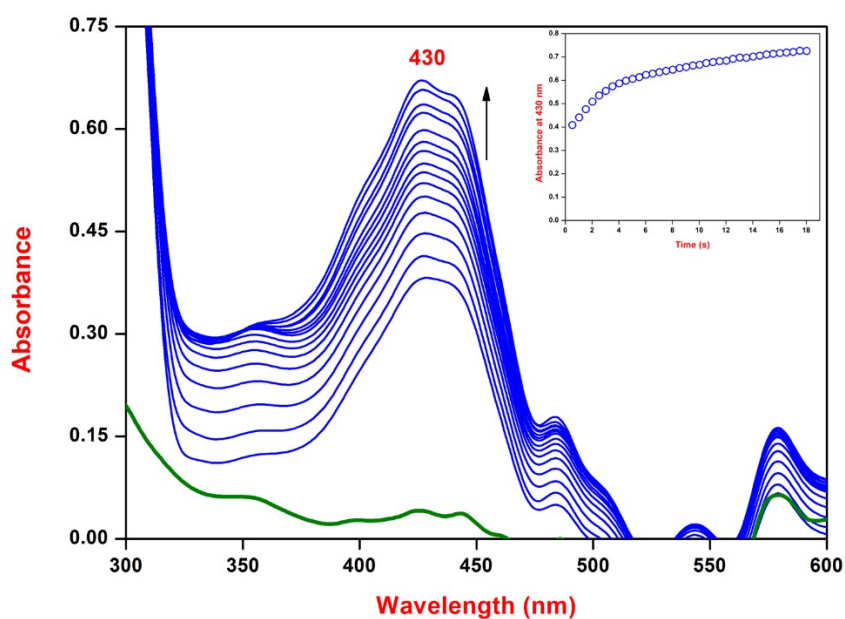

**Figure S15.** (A). UV-vis spectral changes showing the formation of phenoxazinone chromophore at 430 nm upon the addition of *o*-aminophenol ( $1.33 \times 10^{-4}$  M) to a solution of **4** ( $3.33 \times 10^{-6}$  M) in H<sub>2</sub>O at room temperature in the presence of O<sub>2</sub>. Inset shows the time trace of the reaction.

Figure S16

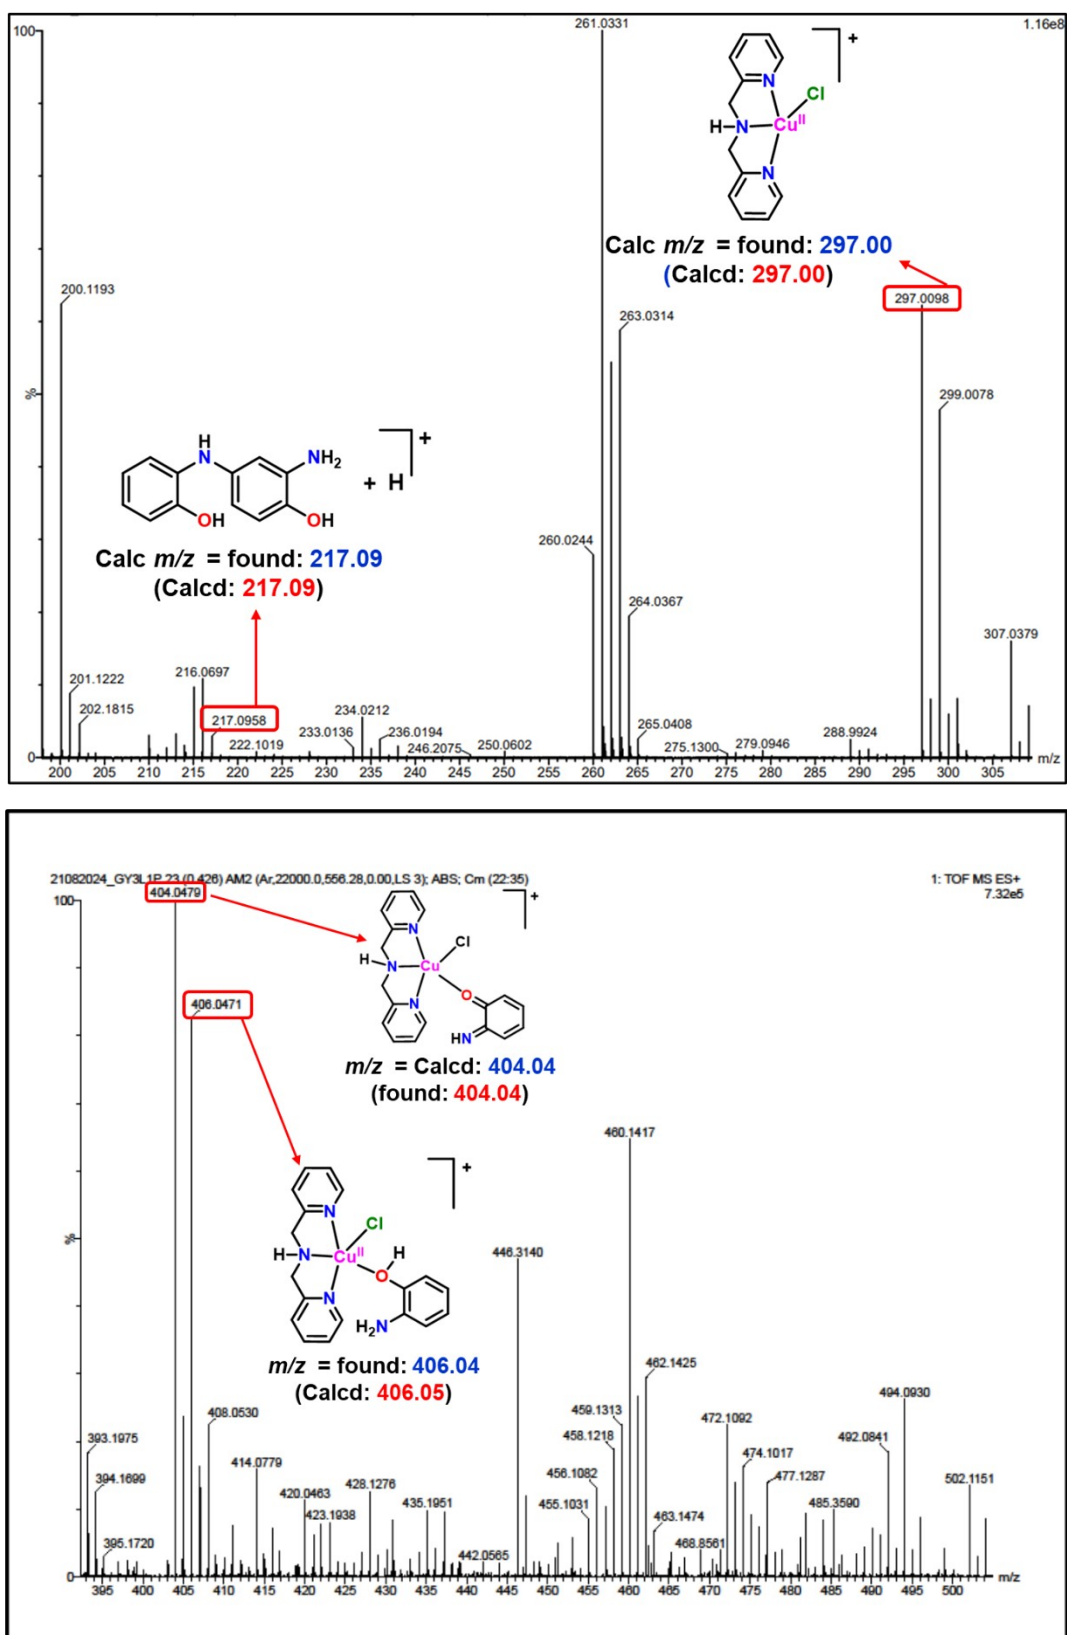

Figure S16. ESI-MS profile of 1:50 mixture of **1** and H<sub>2</sub>AP in methanol-water (1:1 v/v) mixture.

Figure S17

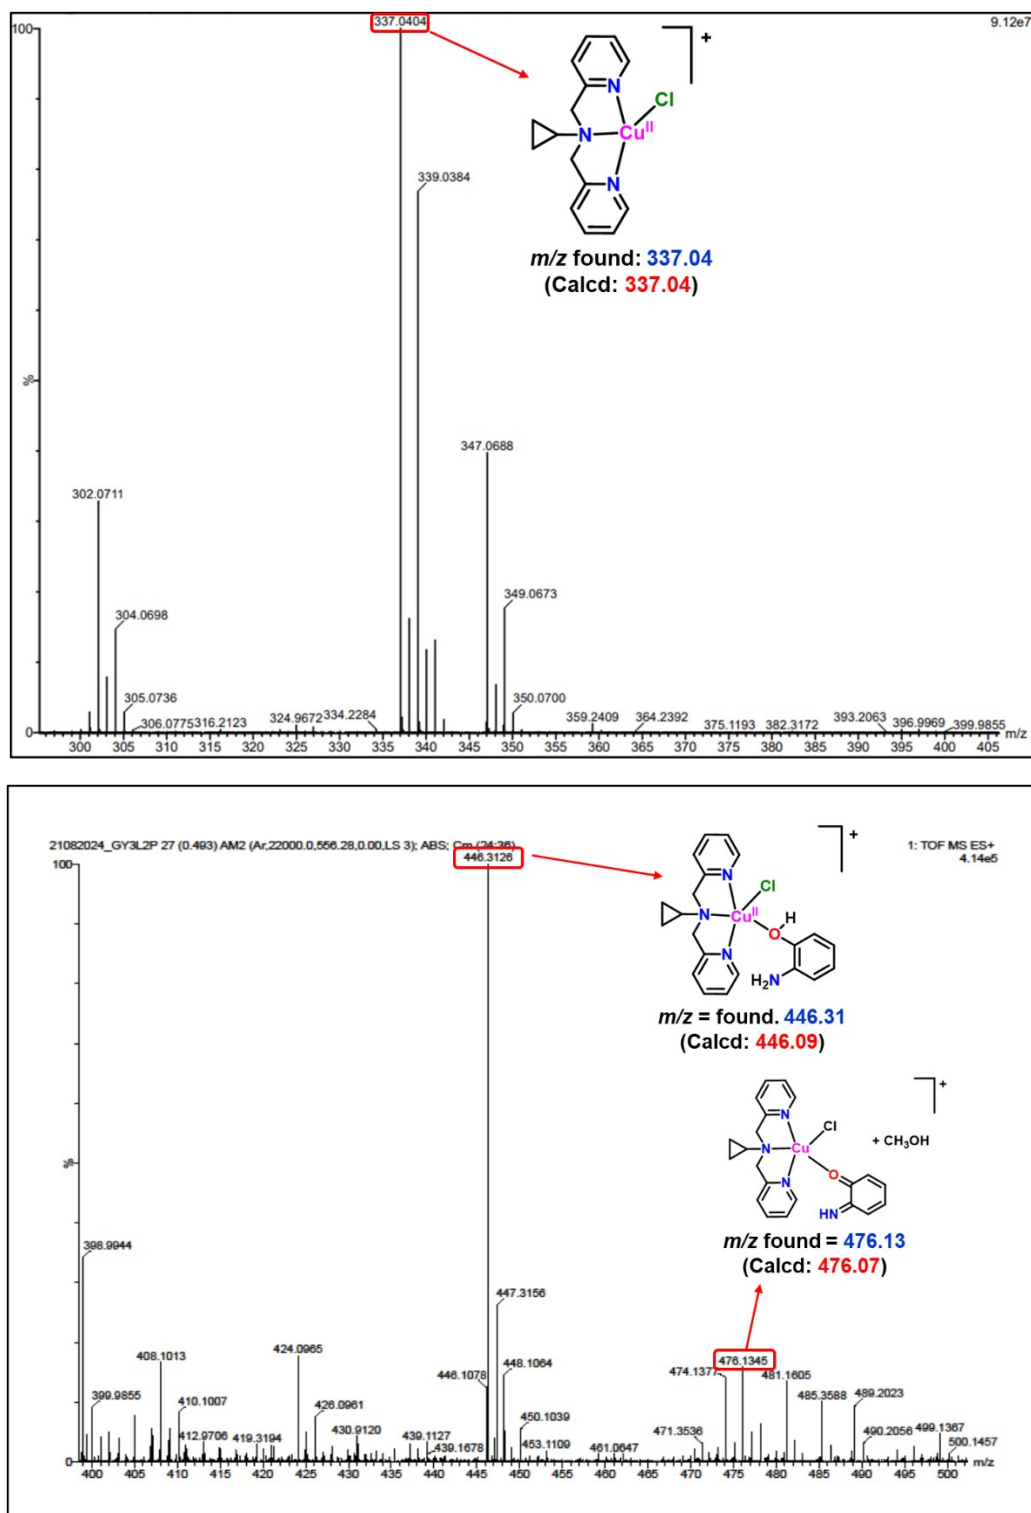

Figure S17. ESI-MS profile of 1:50 mixture of **2** and H<sub>2</sub>AP in methanol-water (1:1 v/v) mixture.

Figure S18

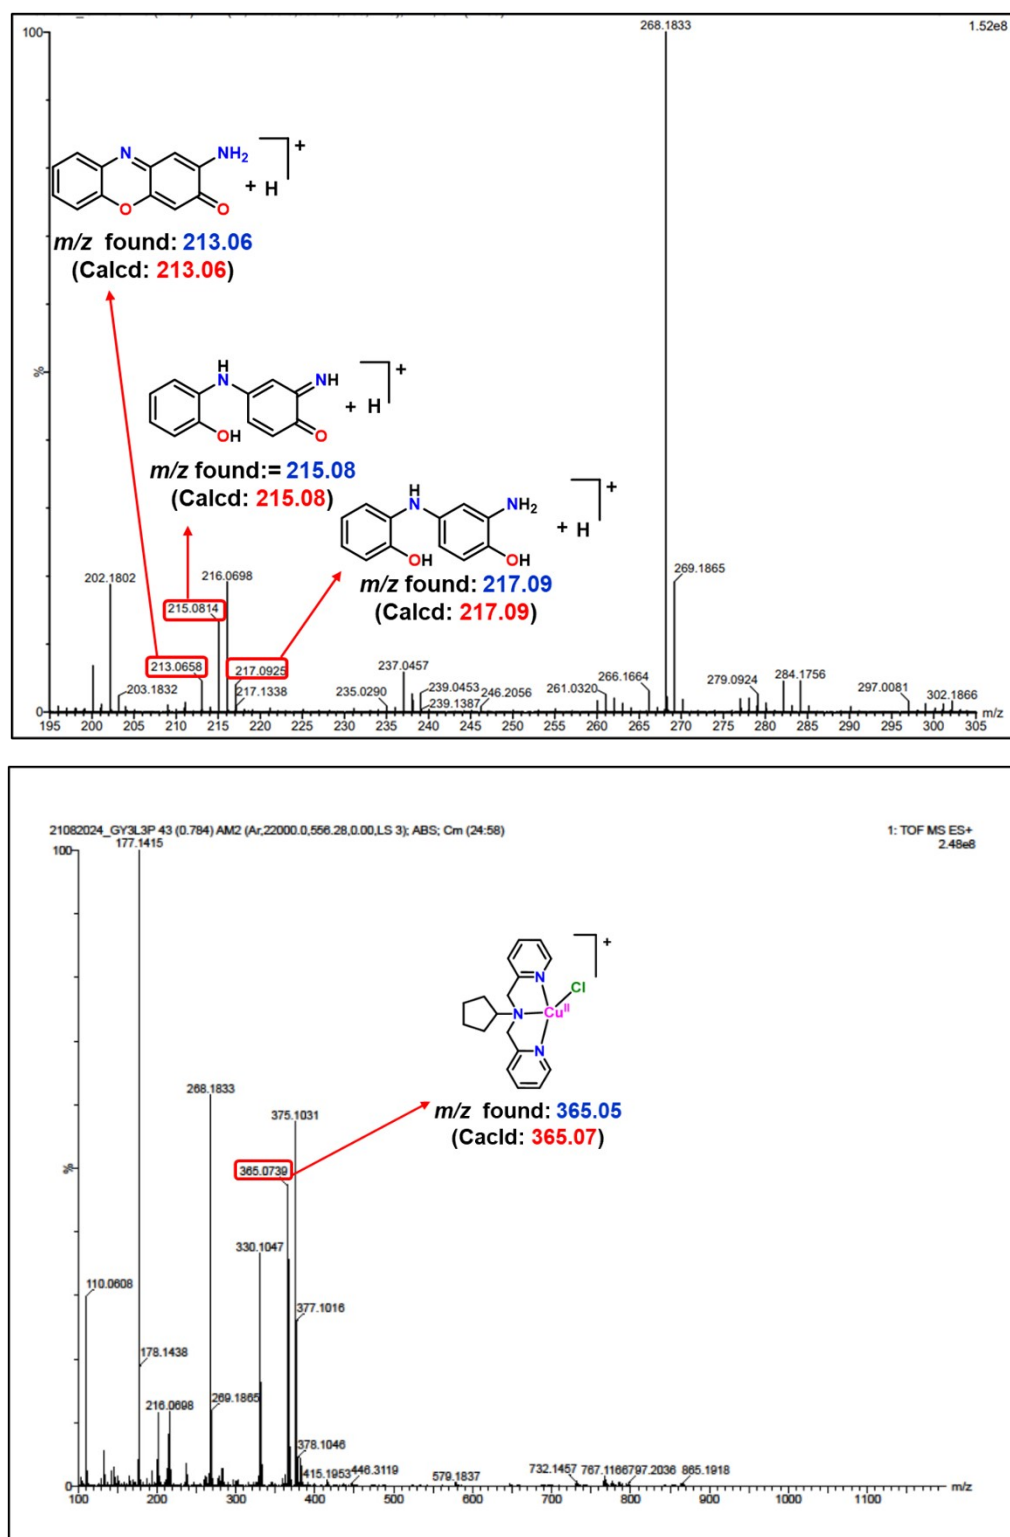

Figure S18. ESI-MS profile of 1:50 mixture of **3** and H<sub>2</sub>AP in methanol-water (1:1 v/v) mixture.

**Figure S18a**

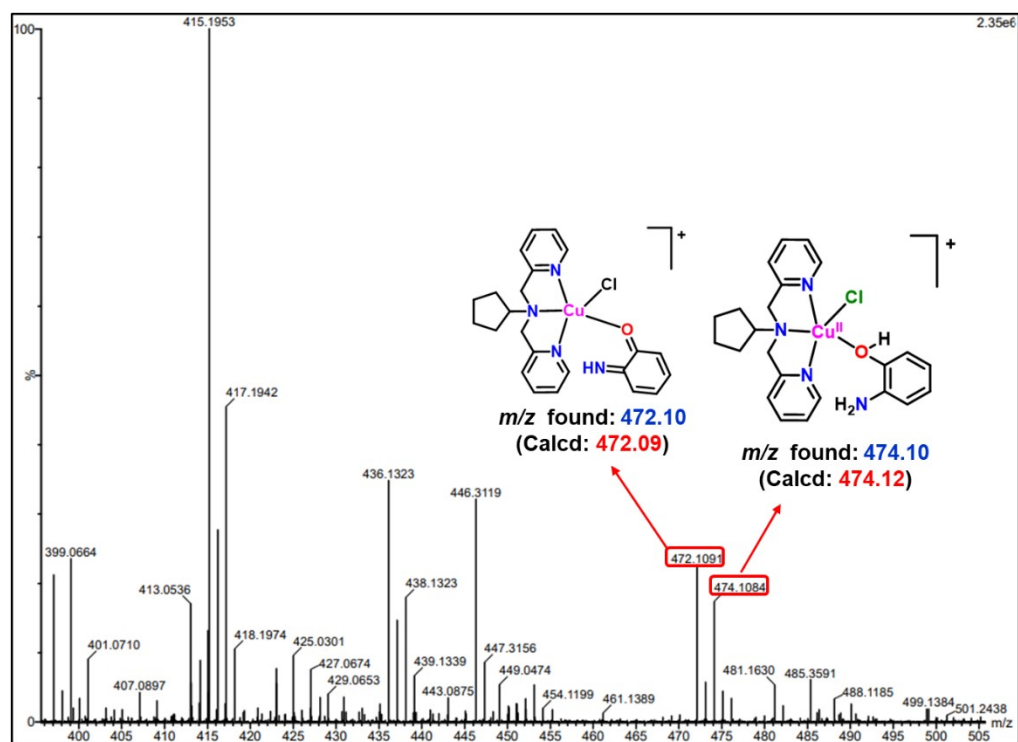

**Figure S18a.** ESI-MS profile of 1:50 mixture of **3** and H<sub>2</sub>AP in methanol-water (1:1 v/v) mixture.

Figure S19

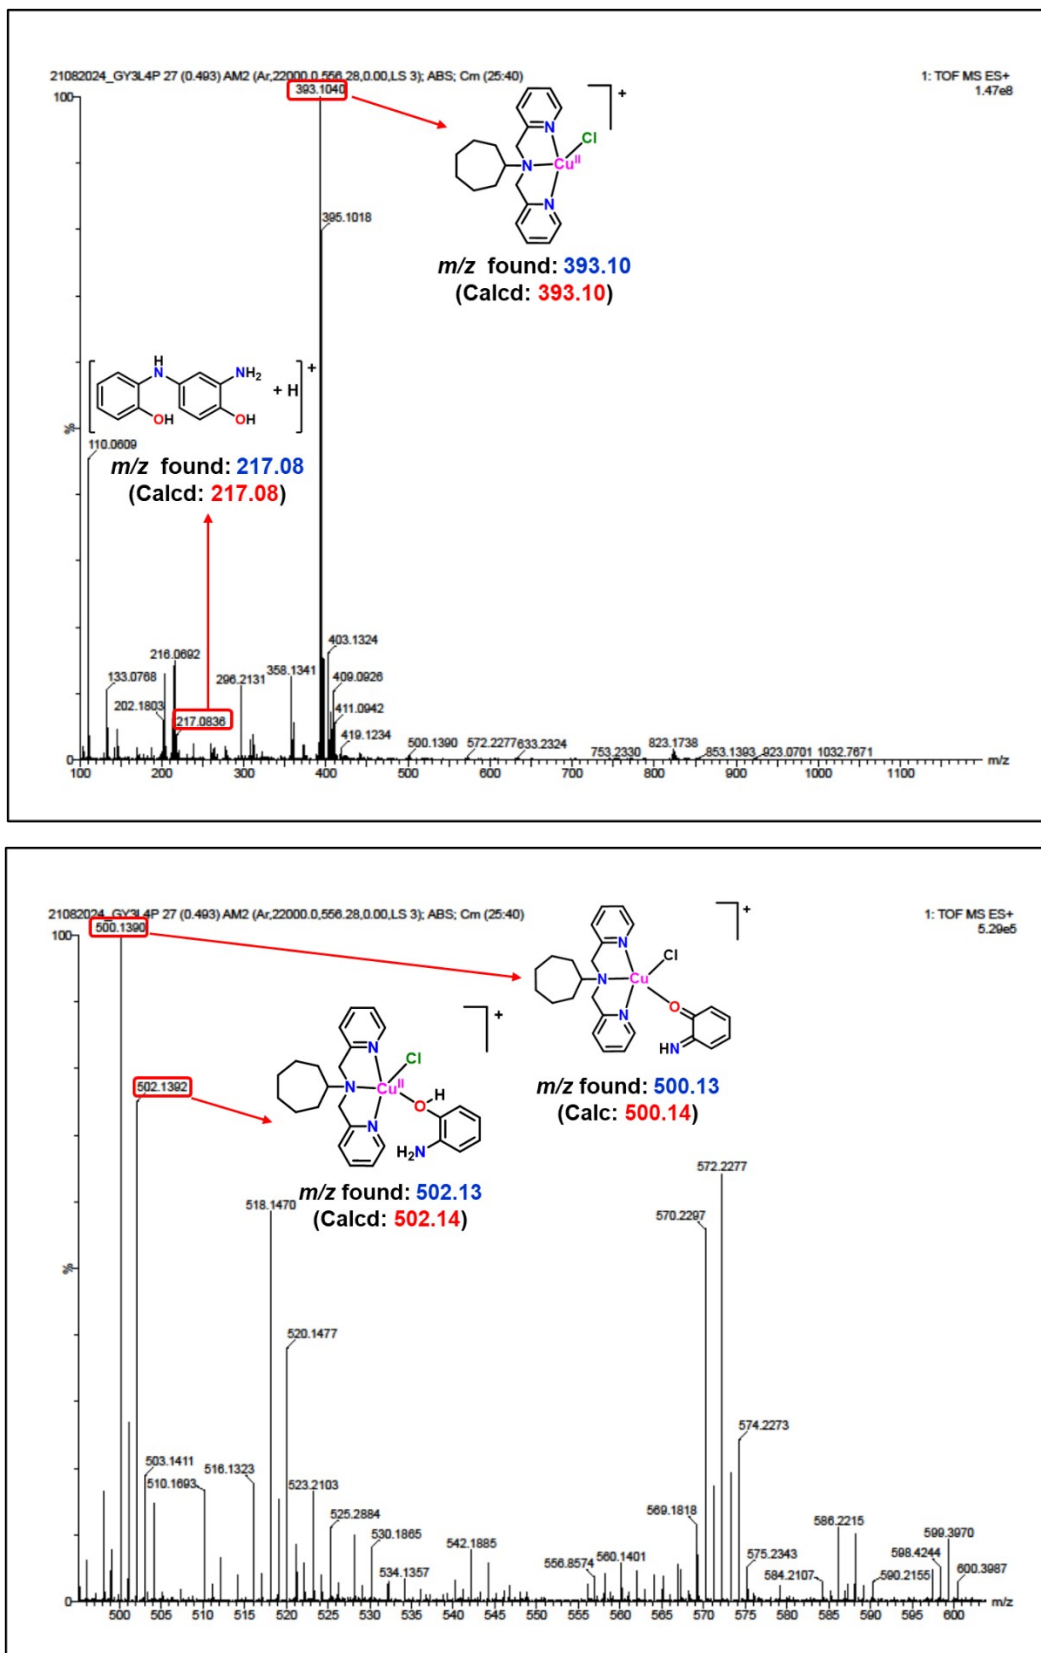

**Figure S19.** ESI-MS profile of 1:50 mixture of **4** and H<sub>2</sub>AP in methanol-water (1:1 v/v) mixture.

Figure S20

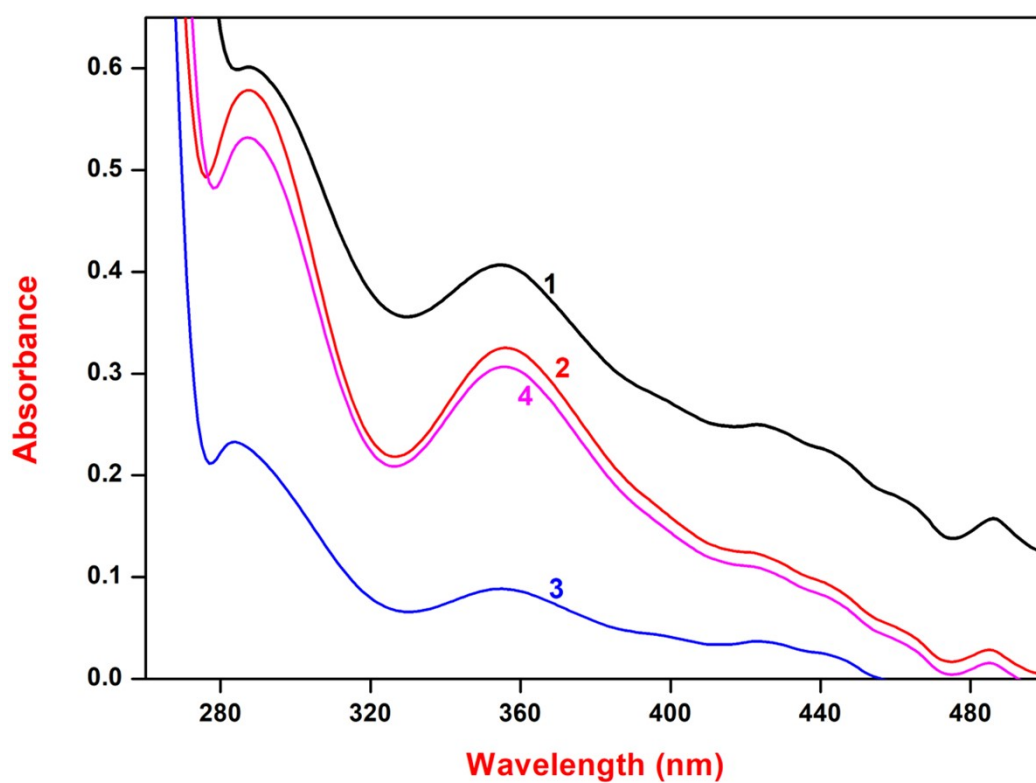

**Figure S20.** Detection of  $\text{H}_2\text{O}_2$  by UV-vis spectroscopy during the oxidation of *o*-aminophenol catalysed by copper(II) complexes **1–4** in dioxygen saturated water solution.

Figure S21

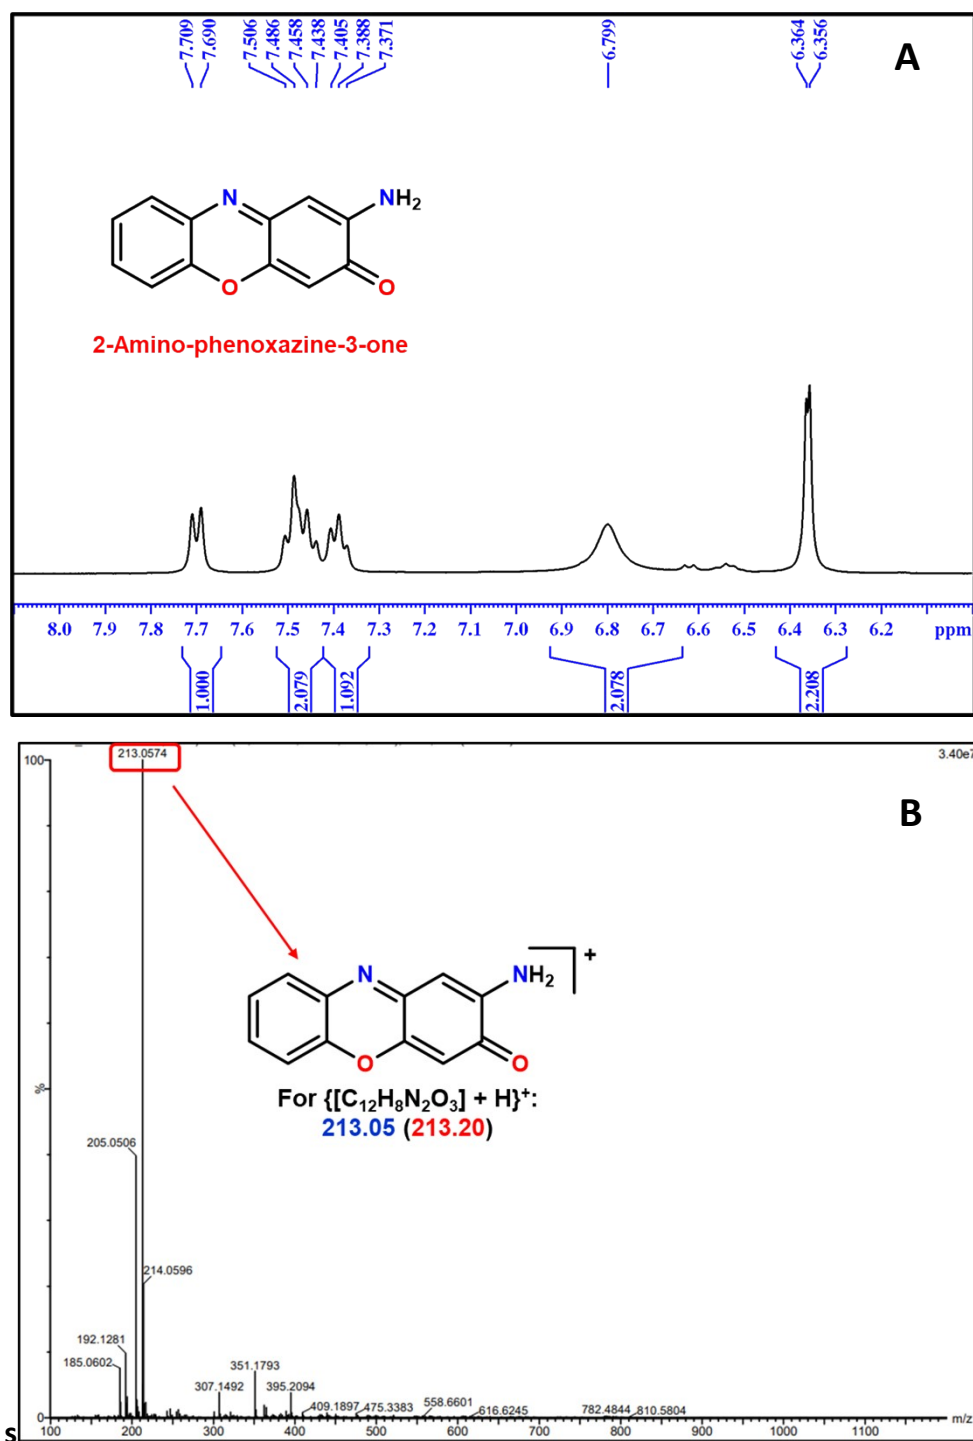

**Figure S21.** (A)  $^1\text{H}$  NMR spectra of APX isolated from the kinetic solution and (B) ESI-MS profile of APX product.



Figure S22

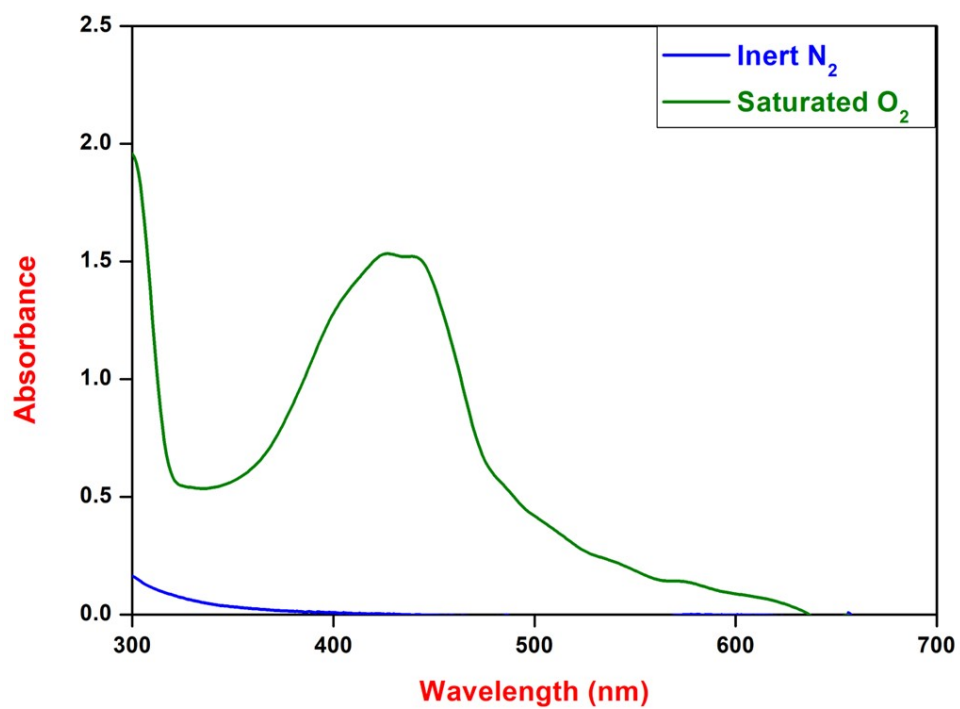

**Figure S22.** UV-vis spectral changes of copper(II) complex **2** with 50 equiv. of substrate under N<sub>2</sub> atmosphere (blue) and O<sub>2</sub> atmosphere (green) in aqueous medium.

**Table S1.** ATR-IR spectral data of ligands **L1–L4** and complexes **1–4**.

| <b>Stretching<br/>vibration<br/>(cm<sup>-1</sup>)</b> | <b>L1</b> | <b>1</b> | <b>L2</b> | <b>2</b> | <b>L3</b> | <b>3</b> | <b>L4</b> | <b>4</b> |
|-------------------------------------------------------|-----------|----------|-----------|----------|-----------|----------|-----------|----------|
| <b>v<sub>(O-H)</sub></b>                              | -         | 3531     | -         | 3486     |           | 3419     | -         | 3424     |
| <b>v<sub>(N-H)</sub></b>                              | 3380      | 3361     | -         | -        | -         | -        | -         | -        |
| <b>v<sub>(C-H)</sub></b>                              | 2960      | 2896     | 2950      | 2896     | 2955      | 2934     | 2931      | 2896     |
| <b>v<sub>(C=N)</sub></b>                              | 1595      | 1471     | 1595      | 1454     | 1585      | 1571     | 1446      | 1436     |
| <b>v<sub>(M-N)</sub></b>                              | -         | 543      | -         | 531      | -         | 520      | -         | 542      |

**Table S2.** TG-DSC data of copper(II) complexes **1–4**.

| Complex  | Temperature range (°C) | Weight loss (%) | Assignments                    | $\Delta H$ (J g <sup>-1</sup> ) |
|----------|------------------------|-----------------|--------------------------------|---------------------------------|
| <b>1</b> | 35–270                 | 16              |                                | -285.76                         |
|          | 270–470                | 18.61           | Decomposition of ligand moiety | -155.76                         |
|          | 470–600                | 47.19           | Formation of CuO               | -1591.40                        |
| <b>2</b> | 35–260                 | 23              |                                | -556.56                         |
|          | 260–340                | 25.29           | Decomposition of ligand moiety | -884.73                         |
|          | 340–740                | 15.98           | Formation of CuO               | -2.72                           |
| <b>3</b> | 35–215                 | 5.5             |                                | -                               |
|          | 215–320                | 19.0            | Decomposition of ligand moiety | -683.61                         |
|          | 320–575                | 54.5            | Formation of CuO               | -4377.13                        |
| <b>4</b> | 35–220                 | 11.32           |                                | -                               |
|          | 220–300                | 18.88           | Decomposition of ligand moiety | -85.36                          |
|          | 300–515                | 45.23           | Formation of CuO               | -1937.77                        |
